# Supplementary material for: Long-Term Sequelae of COVID-19: A Systematic Review and Meta-Analysis of One-Year Follow-Up Studies on Post-COVID Symptoms
Source: MDPI journal article supplement (doi:10.3390/pathogens11020269), 2022-02-19
Supplement: s1 [file s1]

## **Supplementary materials**

Supplementary Methods. Search strategies.

Supplementary Table S1. Risk of bias assessments of 18 eligible papers.

Supplementary Table S2. Information on other reported post-COVID symptoms.

Supplementary Table S3. Sensitivity analyses for prevalence of post-COVID symptoms.

Supplementary Figure S1. Funnel plot of meta-analysis for prevalence of post-COVID fatigue/weakness.

Supplementary Figure S2. Funnel plot of meta-analysis for prevalence of post-COVID dyspnoea/breathlessness.

Supplementary Figure S3. Funnel plot of meta-analysis for prevalence of post-COVID headache.

### **Supplementary Methods. Search strategies.**

PubMed:

#1: COVID-19 OR "COVID 19" [MeSH Terms] OR COVID-2019 OR SARS-CoV-2 OR 2019-nCoV OR 2019-SARS-CoV-2

#2: survivor\* OR recover\* OR persistent OR follow up OR discharge\* OR sequela\* OR long Covid

#3: ("long term" AND follow up) OR 1 year OR one year OR 12 months OR twelve months

#4: #1 AND #2 AND #3 Filters: Humans, English, Chinese, from 2021 – 2021

Embase:

1 exp coronavirus disease 2019/

2 (survivor\* or recover\* or persistent or follow up or discharge\* or sequela\* or long Covid).tw.

3 (("long term" and follow up) or 1 year or one year or 12 months or twelve months).tw.

4 1 and 2 and 3

5 limit 4 to (human and (chinese or english) and yr="2021")

6 limit 5 to conference abstract

7 5 not 6

**Supplementary Table S1. Risk of bias assessments of 18 eligible papers.**

| <b>First author</b>        | <b>1. Sample frame appropriate to address the target population?</b> | <b>2. Were study participants sampled in an appropriate way?</b> | <b>3. Was the sample size adequate?</b> | <b>4. Were the study subjects and the setting described in detail?</b> | <b>5. Was the data analysis conducted with sufficient coverage of the identified sample?</b> | <b>6. Were valid methods used for the identification of the condition?</b> | <b>7. Was the condition measured in a standard, reliable way for all participants?</b> | <b>8. Was there appropriate statistical analysis?</b> | <b>9. Was the response rate adequate, and if not, was the low response rate managed appropriately?</b> | <b>Overall quality rating</b> |
|----------------------------|----------------------------------------------------------------------|------------------------------------------------------------------|-----------------------------------------|------------------------------------------------------------------------|----------------------------------------------------------------------------------------------|----------------------------------------------------------------------------|----------------------------------------------------------------------------------------|-------------------------------------------------------|--------------------------------------------------------------------------------------------------------|-------------------------------|
| Boscolo-Rizzo, P.          | No                                                                   | Yes                                                              | Yes                                     | No                                                                     | Unclear                                                                                      | Yes                                                                        | No                                                                                     | Yes                                                   | Yes                                                                                                    | High                          |
| Boscolo-Rizzo, P.          | Yes                                                                  | Yes                                                              | No                                      | Yes                                                                    | Unclear                                                                                      | Yes                                                                        | Yes                                                                                    | Yes                                                   | Unclear                                                                                                | High                          |
| Catalán, I. P.             | No                                                                   | Yes                                                              | No                                      | Yes                                                                    | Unclear                                                                                      | No                                                                         | No                                                                                     | Yes                                                   | Yes                                                                                                    | Moderate                      |
| Chai, C.                   | No                                                                   | Yes                                                              | Yes                                     | Yes                                                                    | Unclear                                                                                      | No                                                                         | Yes                                                                                    | Yes                                                   | Yes                                                                                                    | High                          |
| Fernández-de-las-Peñas, C. | No                                                                   | Yes                                                              | Yes                                     | Yes                                                                    | Unclear                                                                                      | No                                                                         | No                                                                                     | Yes                                                   | Yes                                                                                                    | Moderate                      |
| Gamberini, L.              | Yes                                                                  | Yes                                                              | No                                      | Yes                                                                    | Unclear                                                                                      | Yes                                                                        | Yes                                                                                    | Yes                                                   | Yes                                                                                                    | High                          |
| Huang, L.                  | No                                                                   | Yes                                                              | Yes                                     | Yes                                                                    | Unclear                                                                                      | Yes                                                                        | Yes                                                                                    | Yes                                                   | Yes                                                                                                    | High                          |
| Latronico, N.              | No                                                                   | Yes                                                              | No                                      | Yes                                                                    | Unclear                                                                                      | Yes                                                                        | Yes                                                                                    | Yes                                                   | No                                                                                                     | Moderate                      |
| Liu, T.                    | No                                                                   | Yes                                                              | Yes                                     | Yes                                                                    | Unclear                                                                                      | No                                                                         | Yes                                                                                    | Yes                                                   | No                                                                                                     | Moderate                      |

|                      |     |     |     |     |         |     |     |     |         |          |
|----------------------|-----|-----|-----|-----|---------|-----|-----|-----|---------|----------|
| Maestre-Muñiz, M. M. | No  | Yes | Yes | Yes | Unclear | Yes | No  | Yes | Yes     | High     |
| Maestrini, V.        | No  | Yes | No  | Yes | Unclear | No  | No  | Yes | Yes     | Low      |
| Méndez, R.           | No  | Yes | No  | No  | Unclear | Yes | No  | No  | Unclear | Low      |
| Rank, A.             | No  | Yes | No  | Yes | Unclear | No  | Yes | Yes | Yes     | Moderate |
| Seeßle, J.           | No  | Yes | No  | Yes | Unclear | No  | Yes | Yes | Unclear | Moderate |
| Wu, X.               | No  | Yes | No  | Yes | Unclear | Yes | Yes | Yes | Yes     | High     |
| Zhan, Y.             | No  | Yes | No  | Yes | Unclear | No  | Yes | Yes | Yes     | Moderate |
| Zhang, X.            | No  | Yes | Yes | Yes | Unclear | No  | No  | Yes | Yes     | High     |
| Zhao, Y.             | Yes | Yes | No  | Yes | Unclear | Yes | Yes | Yes | No      | Moderate |

Note: The risk of bias assessment was conducted based on the “Joanna Briggs Institute (JBI) Critical Appraisal Checklist for Studies Reporting Prevalence Data”

(<https://jbi.global/critical-appraisal-tools>).

**Supplementary Table S2. Information on other reported post-COVID symptoms.**

| <b>Symptoms</b>  | <b>First author</b>  | <b>Sample size</b> | <b>Country</b> | <b>Prevalence of symptom</b> |
|------------------|----------------------|--------------------|----------------|------------------------------|
| Fever            | Boscolo-Rizzo, P.    | 304                | Italy          | 0.015                        |
|                  | Boscolo-Rizzo, P.    | 100                | Italy          | 0                            |
|                  | Catalán, I. P.       | 76                 | Spain          | 0                            |
|                  | Maestre-Muñiz, M. M. | 543                | Spain          | 0                            |
|                  | Méndez, R.           | 171                | Spain          | 0.012                        |
|                  | Seeßle, J.           | 96                 | Germany        | 0.016                        |
|                  | Zhang, X.            | 2433               | China          | 0                            |
| Vomiting/nausea  | Boscolo-Rizzo, P.    | 304                | Italy          | 0.021                        |
|                  | Boscolo-Rizzo, P.    | 100                | Italy          | 0.01                         |
|                  | Liu, T.              | 486                | China          | 0                            |
|                  | Seeßle, J.           | 96                 | Germany        | 0.044                        |
|                  | Zhang, X.            | 2433               | China          | 0.002                        |
| Diarrhoea        | Boscolo-Rizzo, P.    | 304                | Italy          | 0.019                        |
|                  | Boscolo-Rizzo, P.    | 100                | Italy          | 0.02                         |
|                  | Catalán, I. P.       | 76                 | Spain          | 0.053                        |
|                  | Liu, T.              | 486                | China          | 0                            |
|                  | Seeßle, J.           | 96                 | Germany        | 0.033                        |
|                  | Zhang, X.            | 2433               | China          | 0.007                        |
| Abdominal pain   | Boscolo-Rizzo, P.    | 304                | Italy          | 0.01                         |
|                  | Boscolo-Rizzo, P.    | 100                | Italy          | 0.01                         |
|                  | Liu, T.              | 486                | China          | 0                            |
| Loss of appetite | Boscolo-Rizzo, P.    | 304                | Italy          | 0.012                        |
|                  | Boscolo-Rizzo, P.    | 100                | Italy          | 0.01                         |

| Symptoms                          | First author      | Sample size | Country | Prevalence of symptom |
|-----------------------------------|-------------------|-------------|---------|-----------------------|
|                                   | Huang, L.         | 1272        | China   | 0.03                  |
|                                   | Liu, T.           | 486         | China   | 0                     |
| Problems breathing                | Boscolo-Rizzo, P. | 304         | Italy   | 0.067                 |
|                                   | Boscolo-Rizzo, P. | 100         | Italy   | 0.03                  |
| Dry cough                         | Boscolo-Rizzo, P. | 304         | Italy   | 0.043                 |
|                                   | Boscolo-Rizzo, P. | 100         | Italy   | 0.02                  |
| Chest congestion                  | Chai, C.          | 432         | China   | 0.09                  |
| Chest tightness                   | Liu, T.           | 486         | China   | 0.033                 |
|                                   | Zhang, X.         | 2433        | China   | 0.13                  |
| Rhinorrhoea/runny nose            | Catalán, I. P.    | 76          | Spain   | 0.197                 |
| Blocked nose                      | Boscolo-Rizzo, P. | 304         | Italy   | 0.036                 |
|                                   | Boscolo-Rizzo, P. | 100         | Italy   | 0.03                  |
| Sinonasal pain                    | Boscolo-Rizzo, P. | 304         | Italy   | 0.026                 |
|                                   | Boscolo-Rizzo, P. | 100         | Italy   | 0.02                  |
| Dysphagia/swallowing difficulties | Catalán, I. P.    | 76          | Spain   | 0.066                 |
| Odynophagia/painful swallowing    | Catalán, I. P.    | 76          | Spain   | 0.026                 |
| Wheezing                          | Boscolo-Rizzo, P. | 304         | Italy   | 0.02                  |
|                                   | Boscolo-Rizzo, P. | 100         | Italy   | 0.02                  |
| Vertigo                           | Seeßle, J.        | 96          | Germany | 0.231                 |
| Paraesthesia                      | Méndez, R.        | 171         | Spain   | 0.07                  |
| Edema                             | Liu, T.           | 486         | China   | 0.002                 |
|                                   | Zhang, X.         | 2433        | China   | 0.014                 |
| Shivering                         | Seeßle, J.        | 96          | Germany | 0.051                 |
| Sweeting                          | Zhang, X.         | 2433        | China   | 0.169                 |

| Symptoms                                            | First author         | Sample size | Country | Prevalence of symptom |
|-----------------------------------------------------|----------------------|-------------|---------|-----------------------|
| Night sweats                                        | Liu, T.              | 486         | China   | 0.002                 |
| Tremors                                             | Méndez, R.           | 171         | Spain   | 0.012                 |
| Skin pruritus                                       | Liu, T.              | 486         | China   | 0.006                 |
| Red eyes                                            | Boscolo-Rizzo, P.    | 304         | Italy   | 0.013                 |
|                                                     | Boscolo-Rizzo, P.    | 100         | Italy   | 0.01                  |
| Cold                                                | Seeßle, J.           | 96          | Germany | 0.103                 |
| Numbness in limbs                                   | Liu, T.              | 486         | China   | 0.004                 |
| Muscle weakness                                     | Maestre-Muñiz, M. M. | 543         | Spain   | 0.074                 |
| Hypoacusis/hearing loss                             | Catalán, I. P.       | 76          | Spain   | 0.158                 |
|                                                     | Liu, T.              | 486         | China   | 0.002                 |
| Vision loss                                         | Liu, T.              | 486         | China   | 0                     |
|                                                     | Maestrini, V.        | 118         | Italy   | 0.017                 |
| Smell or taste impairment                           | Boscolo-Rizzo, P.    | 304         | Italy   | 0.22                  |
|                                                     | Zhao, Y.             | 94          | China   | 0.117                 |
| PTSD symptom                                        | Latronico, N.        | 49          | Italy   | 0.06                  |
|                                                     | Méndez, R.           | 171         | Spain   | 0.246                 |
| Cognitive impairment/<br>neurocognitive dysfunction | Latronico, N.        | 45          | Italy   | 0.16                  |
|                                                     | Méndez, R.           | 171         | Spain   | 0.468                 |

**Supplementary Table S3. Sensitivity analyses for prevalence of post-COVID symptoms.**

| <b>Sensitivity analyses:<br/>Pooled prevalence (95% CI)</b> | <b>Excluding studies rated as<br/>poor quality</b> | <b>Prevalence estimates after<br/>logit transformation</b> | <b>Prevalence estimates after<br/>Freeman-Tukey double<br/>arcsine transformation</b> | <b>Range of pooled prevalence<br/>after excluding individual<br/>studies</b> |
|-------------------------------------------------------------|----------------------------------------------------|------------------------------------------------------------|---------------------------------------------------------------------------------------|------------------------------------------------------------------------------|
| Fatigue/weakness                                            | 0.28 (0.17-0.39)                                   | 0.25 (0.17-0.36)                                           | 0.27 (0.17-0.38)                                                                      | 0.26-0.30                                                                    |
| Dyspnoea/breathlessness                                     | 0.19 (0.13-0.25)                                   | 0.15 (0.10-0.22)                                           | 0.17 (0.10-0.25)                                                                      | 0.16-0.20                                                                    |
| Cough                                                       | 0.05 (0.04-0.07)                                   | 0.06 (0.04-0.10)                                           | 0.06 (0.04-0.09)                                                                      | 0.05-0.07                                                                    |
| Chest pain                                                  | 0.05 (0.02-0.07)                                   | 0.05 (0.04-0.07)                                           | 0.05 (0.03-0.07)                                                                      | 0.04-0.05                                                                    |
| Sore throat/difficult to swallow                            | -                                                  | 0.03 (0.02-0.05)                                           | 0.03 (0.01-0.04)                                                                      | 0.02-0.03                                                                    |
| Sputum production                                           | 0.02 (0.01-0.03)                                   | 0.02 (0.01-0.04)                                           | 0.02 (0.01-0.03)                                                                      | 0.02                                                                         |
| Depression                                                  | 0.20 (0.08-0.33)                                   | 0.22 (0.13-0.35)                                           | 0.22 (0.12-0.35)                                                                      | 0.18-0.26                                                                    |
| Anxiety                                                     | 0.19 (0.13-0.25)                                   | 0.20 (0.11-0.33)                                           | 0.21 (0.12-0.32)                                                                      | 0.19-0.25                                                                    |
| Memory loss/memory complaints                               | 0.20 (0.03-0.36)                                   | 0.13 (0.05-0.27)                                           | 0.16 (0.04-0.35)                                                                      | 0.14-0.24                                                                    |
| Concentration difficulties                                  | -                                                  | 0.15 (0.03-0.47)                                           | 0.17 (0.02-0.41)                                                                      | -                                                                            |
| Insomnia/sleep difficulties                                 | -                                                  | 0.10 (0.07-0.16)                                           | 0.11 (0.06-0.17)                                                                      | 0.10-0.13                                                                    |
| Loss of smell/smell disorder                                | 0.06 (0.04-0.08)                                   | 0.06 (0.03-0.13)                                           | 0.07 (0.04-0.12)                                                                      | 0.05-0.09                                                                    |
| Loss of taste/taste disorder                                | 0.05 (0.03-0.07)                                   | 0.05 (0.02-0.10)                                           | 0.05 (0.03-0.09)                                                                      | 0.03-0.06                                                                    |
| Arthromyalgia                                               | -                                                  | 0.24 (0.13-0.38)                                           | 0.24 (0.10-0.42)                                                                      | -                                                                            |
| Muscle pain                                                 | -                                                  | 0.07 (0.05-0.10)                                           | 0.07 (0.04-0.11)                                                                      | 0.07-0.09                                                                    |
| Joint pain                                                  | -                                                  | 0.09 (0.06-0.15)                                           | 0.10 (0.05-0.16)                                                                      | 0.08-0.12                                                                    |
| Back/waist pain                                             | -                                                  | 0.04 (0.02-0.07)                                           | 0.04 (0.02-0.06)                                                                      | -                                                                            |
| Headache                                                    | 0.06 (0.04-0.08)                                   | 0.07 (0.04-0.12)                                           | 0.08 (0.05-0.11)                                                                      | 0.06-0.09                                                                    |
| Dizziness                                                   | -                                                  | 0.04 (0.03-0.06)                                           | 0.04 (0.03-0.05)                                                                      | 0.03-0.04                                                                    |
| Skin rash                                                   | -                                                  | 0.03 (0.02-0.05)                                           | 0.03 (0.02-0.04)                                                                      | -                                                                            |
| Hair loss                                                   | -                                                  | 0.06 (0.02-0.12)                                           | 0.05 (0.01-0.14)                                                                      | 0.03-0.09                                                                    |



|              |                  |                  |                  |           |
|--------------|------------------|------------------|------------------|-----------|
| Palpitations | 0.05 (0.03-0.08) | 0.05 (0.04-0.08) | 0.05 (0.03-0.08) | 0.04-0.06 |
|--------------|------------------|------------------|------------------|-----------|

---

Note: “-” refers to not applicable.

**Supplementary Figure S1. Funnel plot of meta-analysis for prevalence of post-COVID fatigue/weakness.**

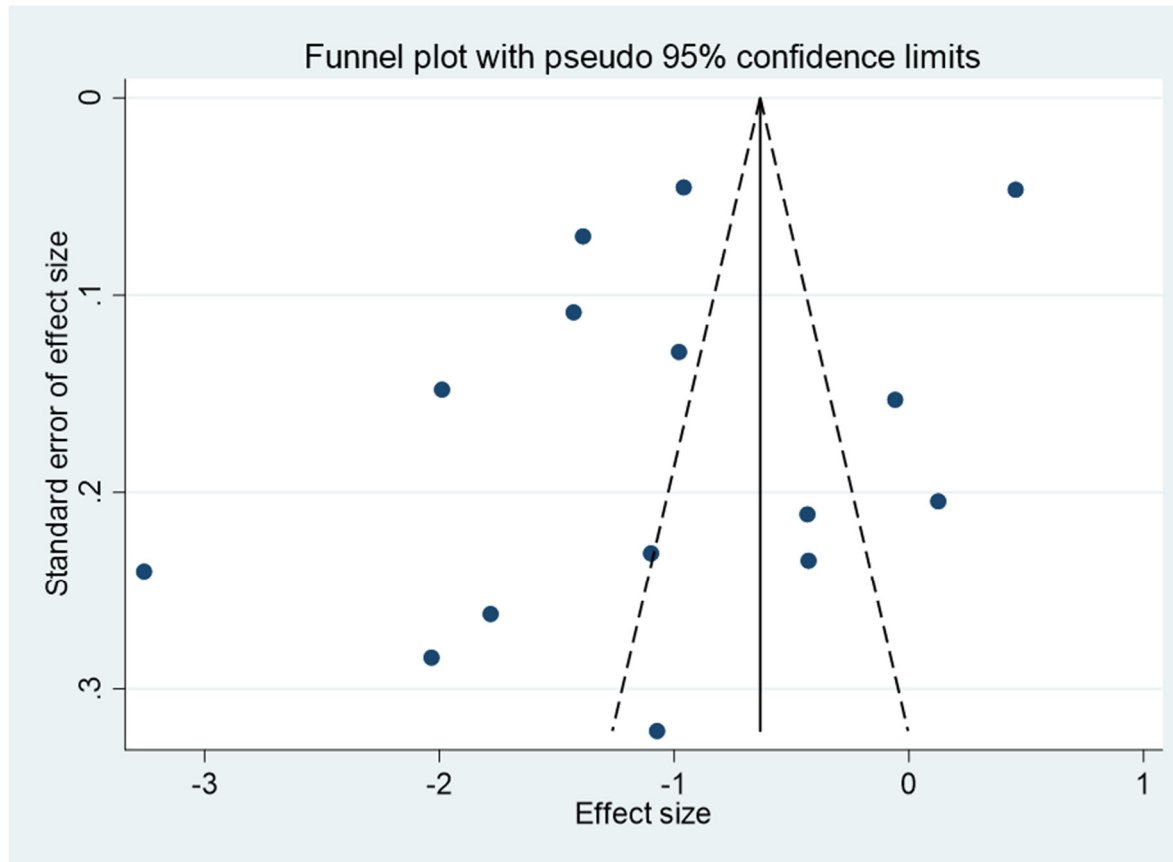

Note: The prevalence estimates were logit transformed.

**Supplementary Figure S2. Funnel plot of meta-analysis for prevalence of post-COVID dyspnoea/breathlessness.**

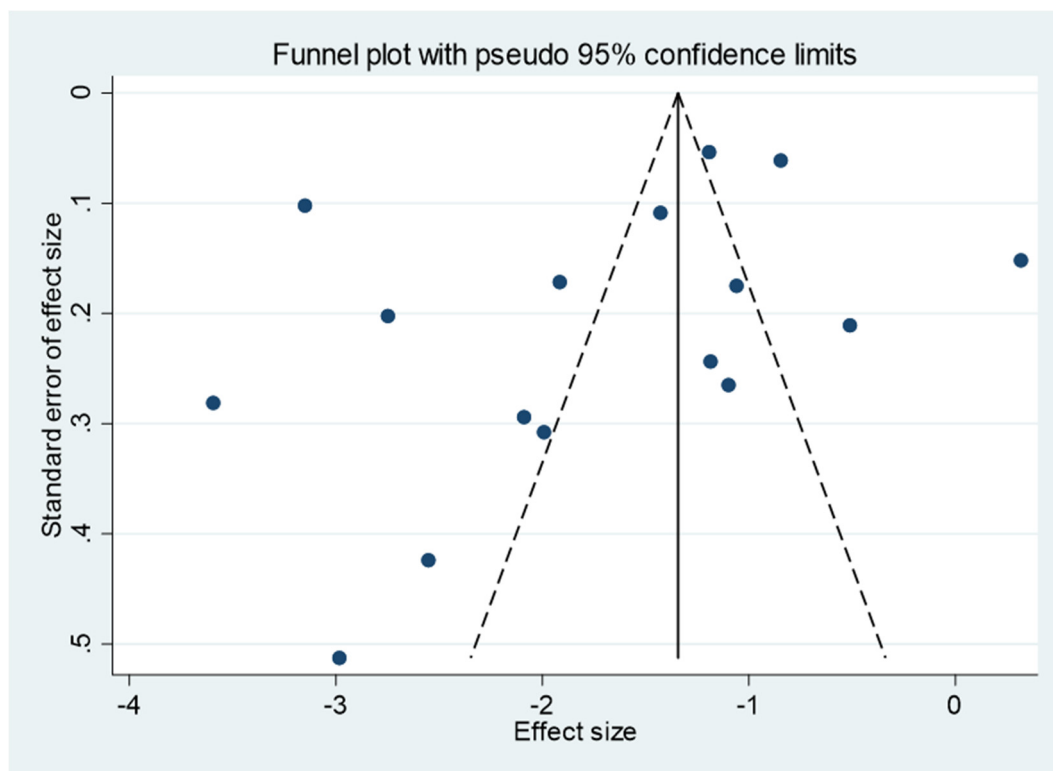

Note: The prevalence estimates were logit transformed.

**Supplementary Figure S3. Funnel plot of meta-analysis for prevalence of post-COVID headache.**

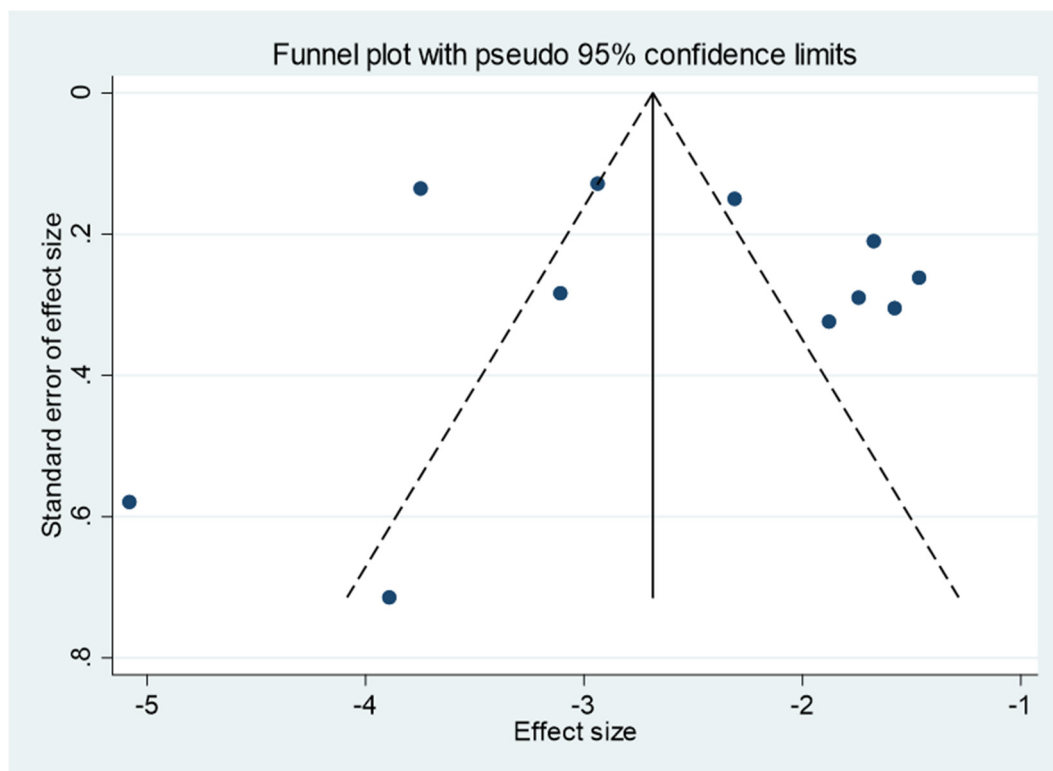

Note: The prevalence estimates were logit transformed.
